# Supplementary material for: Involvement of Chromatin Remodeling Genes and the Rho GTPases RhoB and CDC42 in Ovarian Clear Cell Carcinoma
Source: PubMed Central journal article supplement (PMC5447048; doi:10.3389/fonc.2017.00109), 2017-05-29

Supplementary File 2.

Boxplots of log<sub>2</sub> significant ( $P < 0.05$ ) differentially expressed genes in selected pathways. Kruskal-Wallis test was used for significance test between subgroups. C: Clear Cell, E: Endometrioid, M: Mucinous, S: Serous.

# Chromatin Organization

**ARID4B P= 0.038**

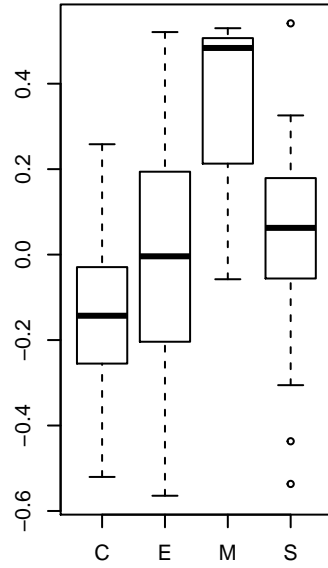

**ATF2 P= 0.019**

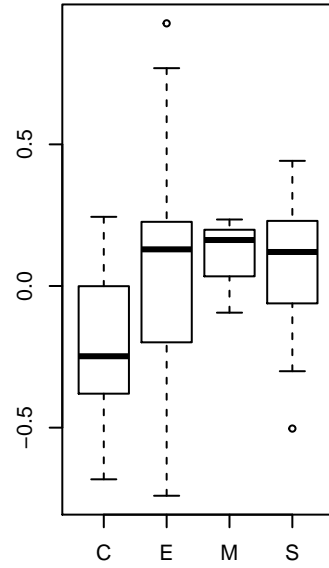

**BRPF1 P= 0.04**

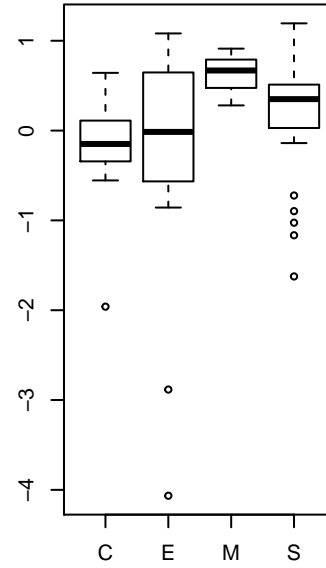

**BRPF3 P= 0.001**

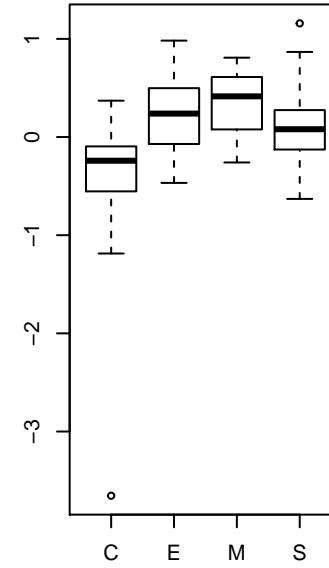

**ELP3 P= 0.05**

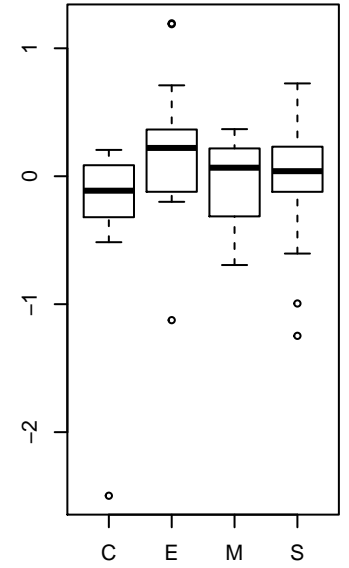

**GATAD2B P= 0.039**

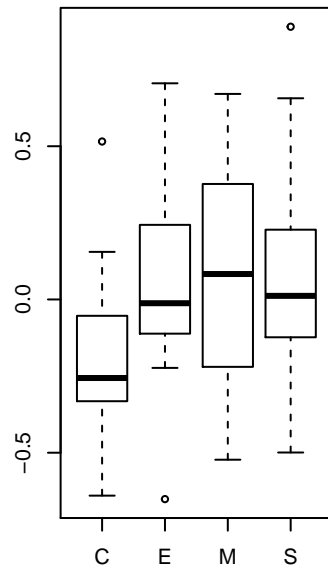

**HIST1H2AB P= 0.037**

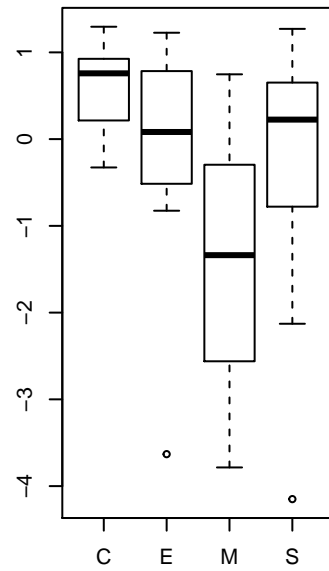

**HIST1H2AC P= 0.004**

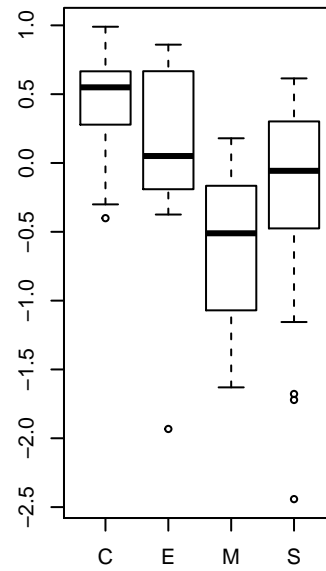

**HIST1H2AD P= 0.013**

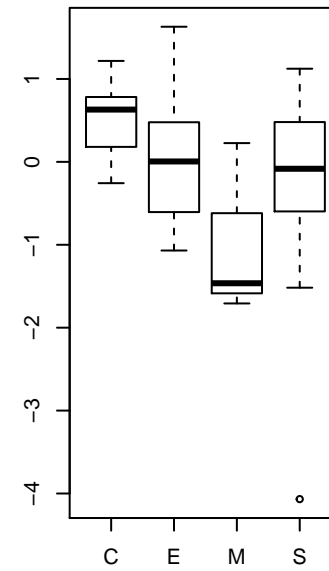

**HIST1H2AH P= 0.019**

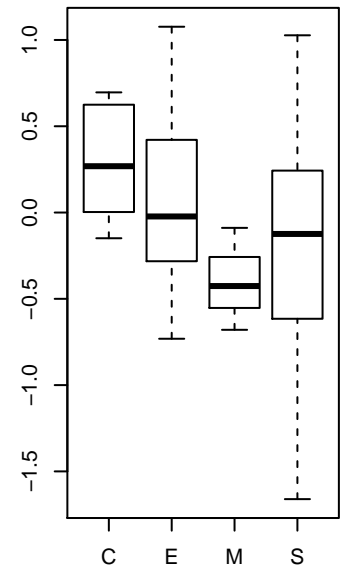

# Chromatin Organization

**HIST1H2AI P= 0.034**

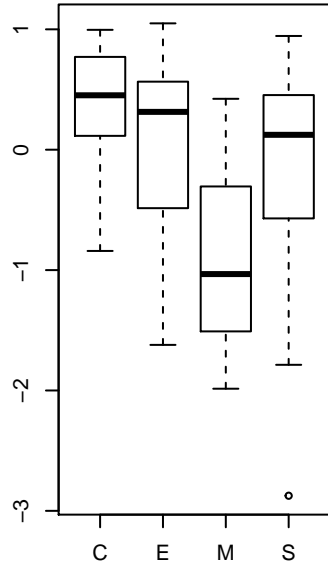

**HIST1H2AJ P= 0.005**

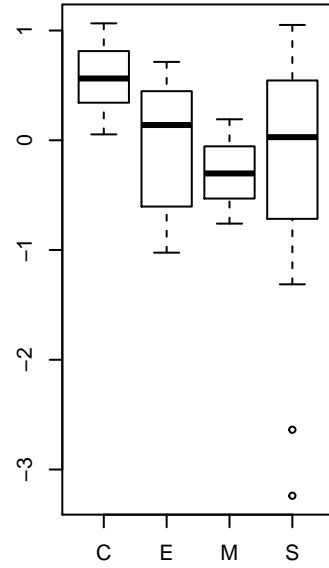

**HIST1H2BC P= 0.045**

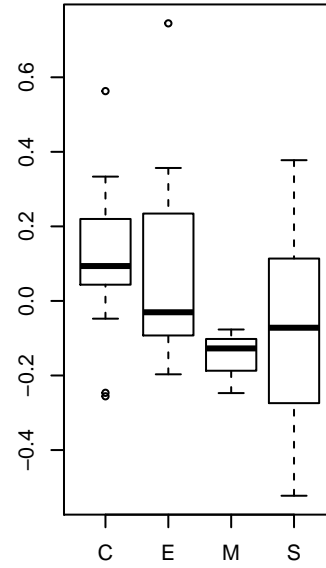

**HIST1H2BH P= 0.019**

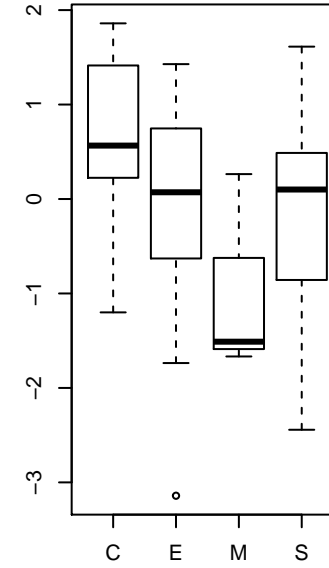

**HIST1H2BK P= 0.007**

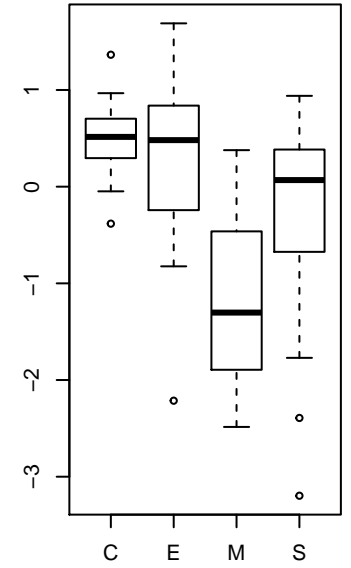

**HIST1H2BM P= 0.021**

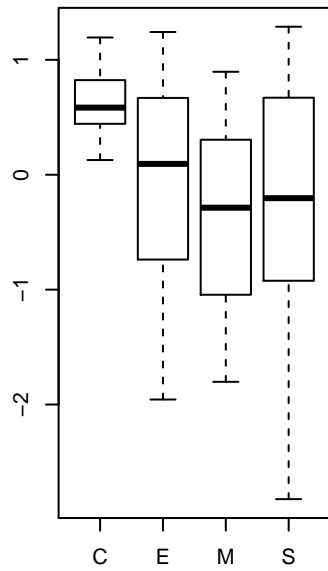

**HIST1H3A P= 0.021**

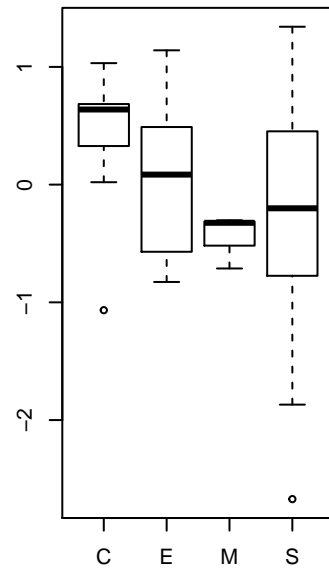

**HIST1H3D P= 0.028**

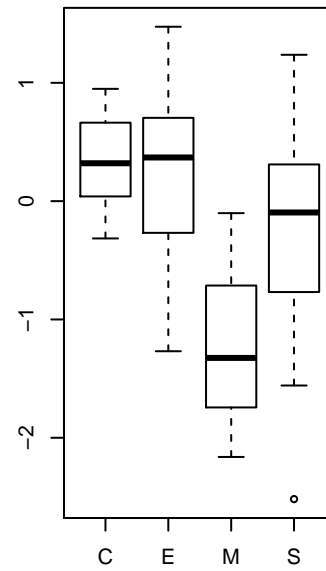

**HIST1H3F P= 0.005**

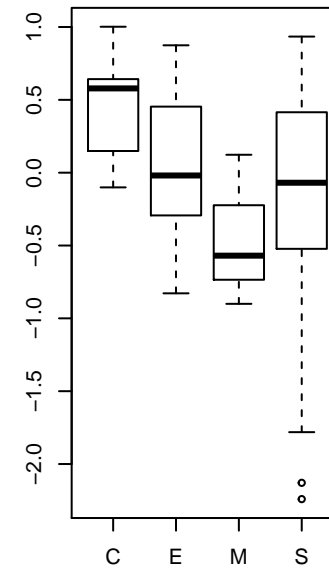

**HIST1H3H P= 0.048**

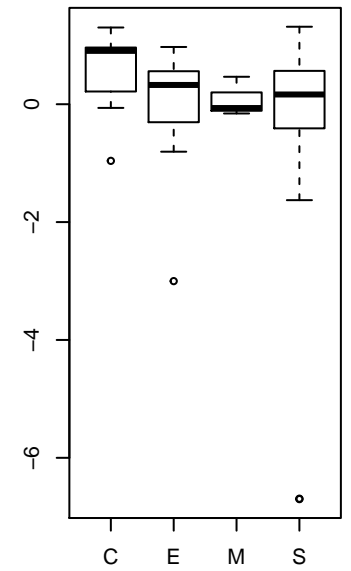

# Chromatin Organization

**HIST1H3I P= 0.024**

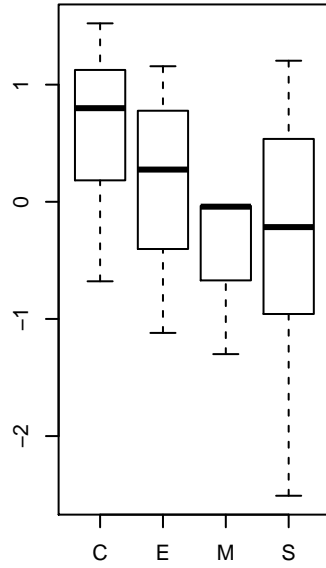

**HIST1H4A P= 0.012**

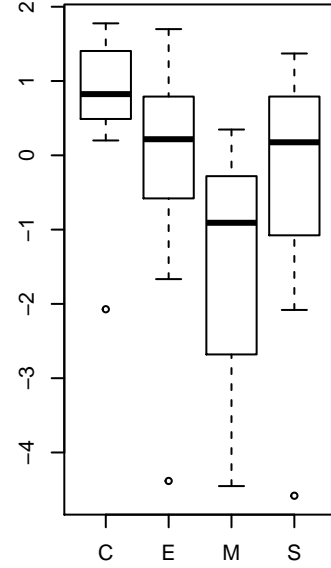

**HIST2H2AA3 P= 0.003**

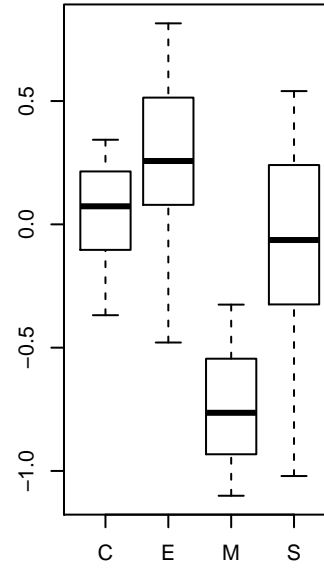

**JMJD6 P= 0.009**

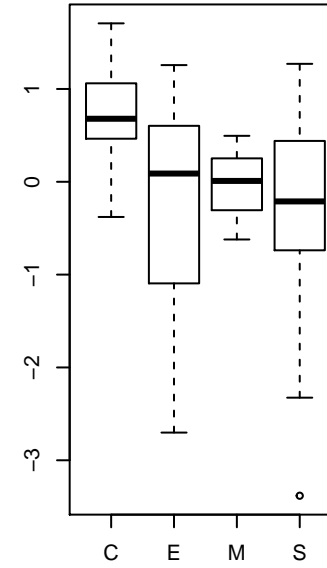

**KAT2A P= 0**

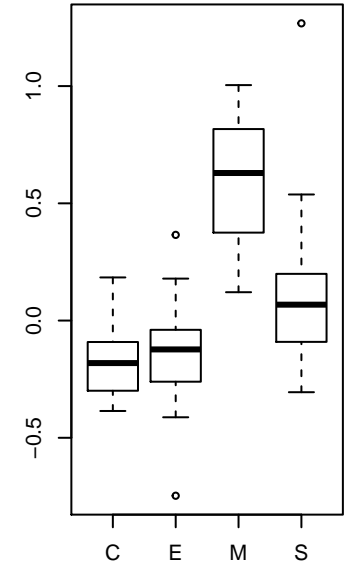

**MTA1 P= 0.007**

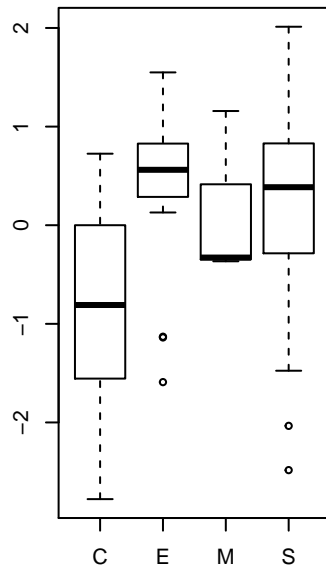

**NFKB2 P= 0.01**

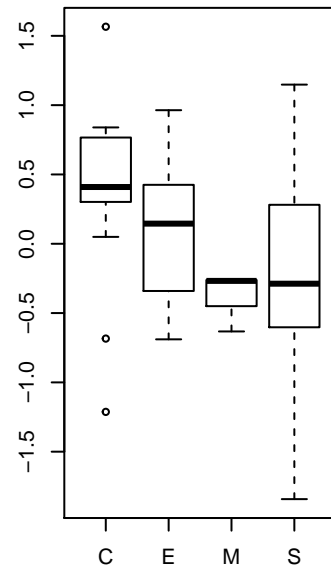

**PHF8 P= 0.003**

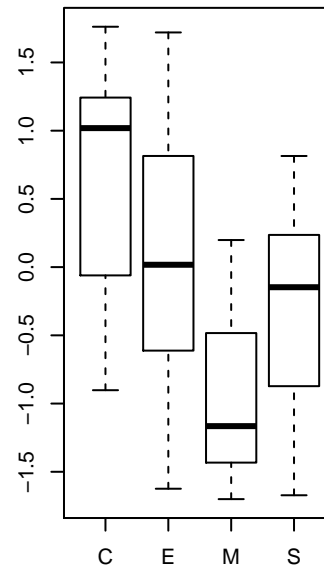

**RBBP7 P= 0.044**

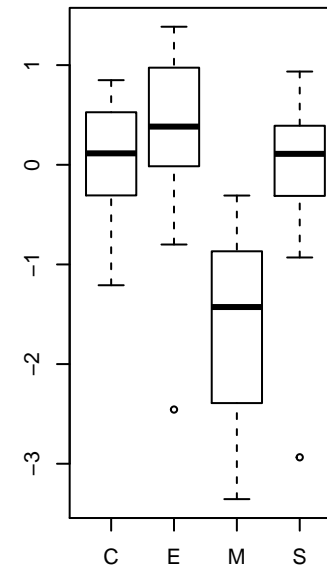

**RUVBL2 P= 0.021**

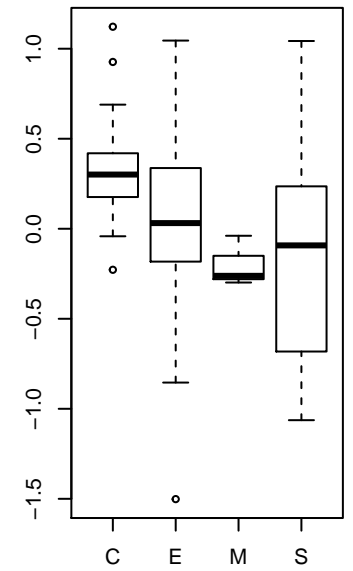

# Chromatin Organization

SAP18 P= 0.002

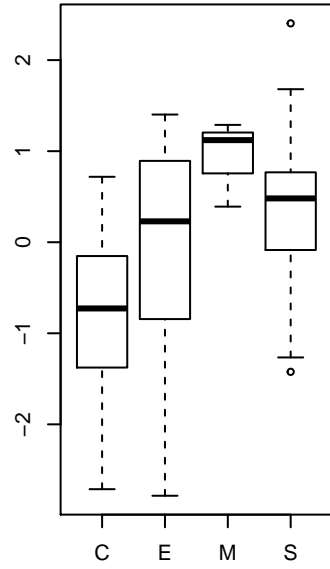

SMARCC2 P= 0.008

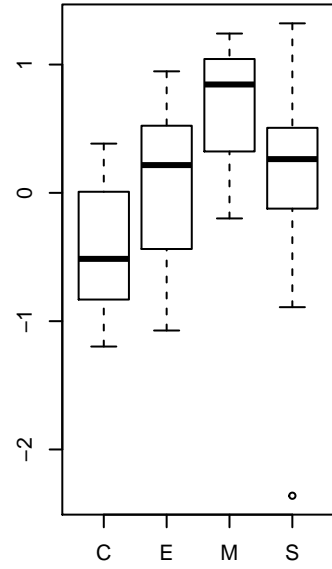

SMARCD3 P= 0.016

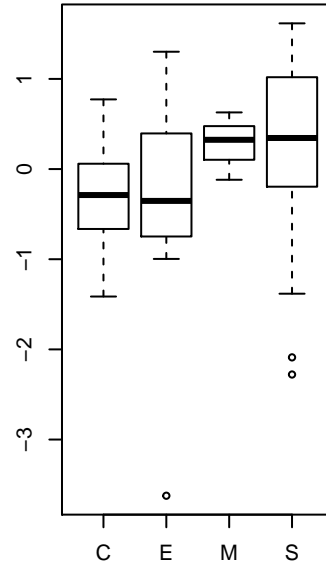

# PI3K/AKT Signaling in Cancer

**BTC P= 0.043**

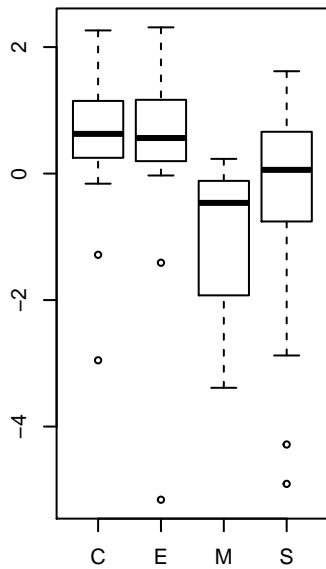

**CDKN1A P= 0.002**

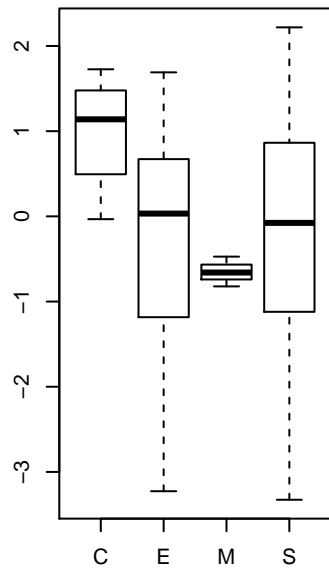

**EGFR P= 0.031**

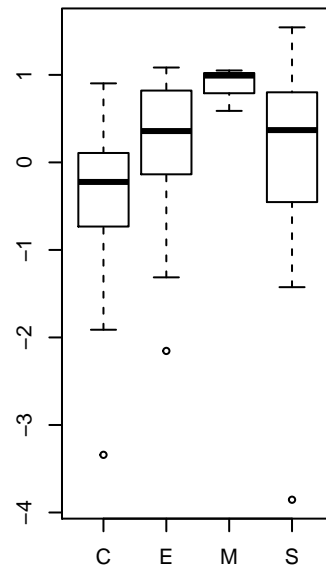

**ERBB2 P= 0.006**

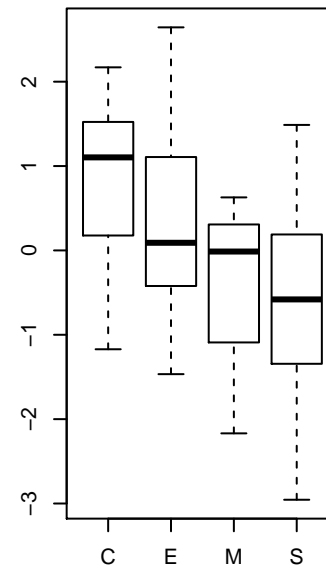

**ERBB3 P= 0.025**

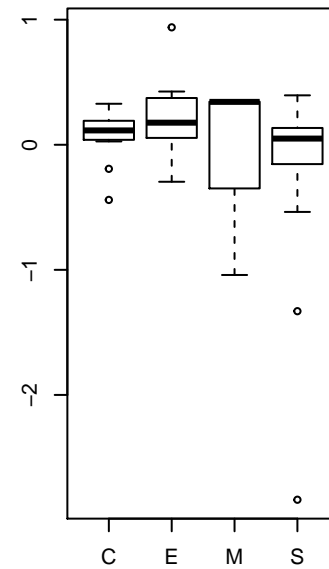

**FGF18 P= 0.007**

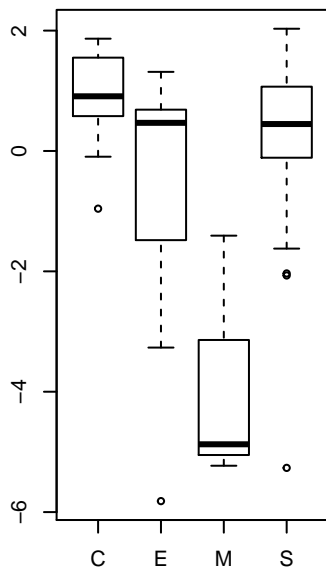

**FGF9 P= 0.012**

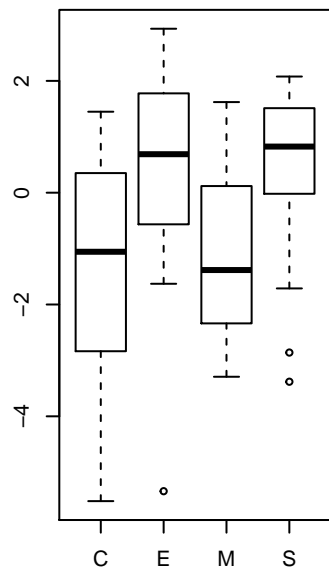

**FGFR3 P= 0.005**

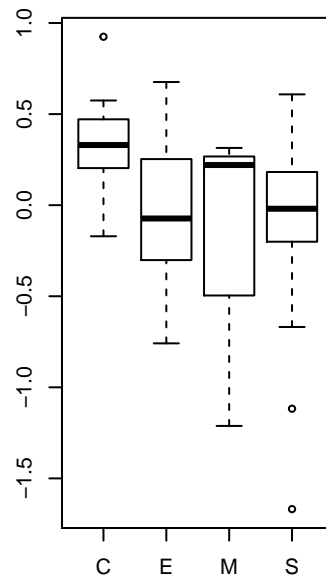

**FGFR4 P= 0**

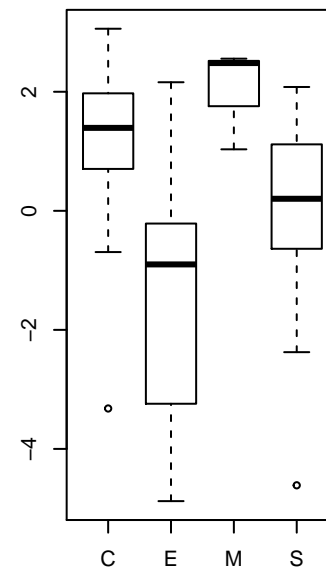

**FOXO3 P= 0.04**

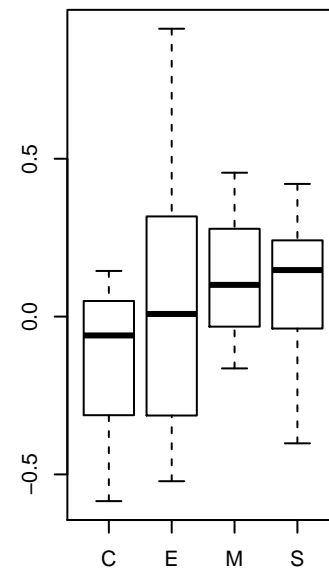

# PI3K/AKT Signaling in Cancer

**FOXO4 P= 0.035**

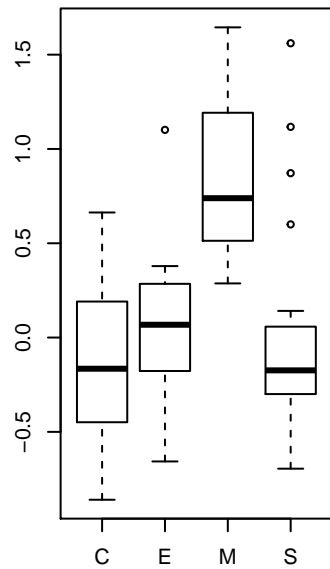

**GAB1 P= 0.002**

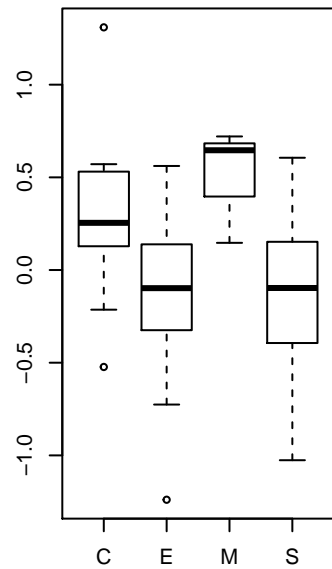

**GRB2 P= 0.007**

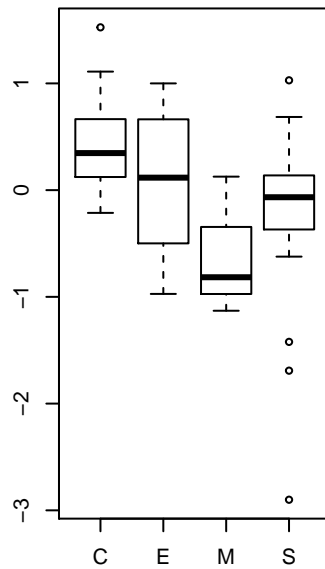

**IRS1 P= 0.02**

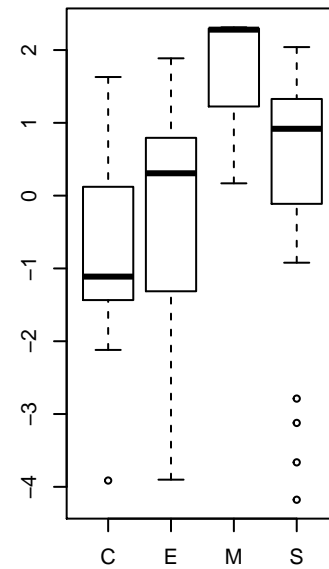

**MET P= 0.005**

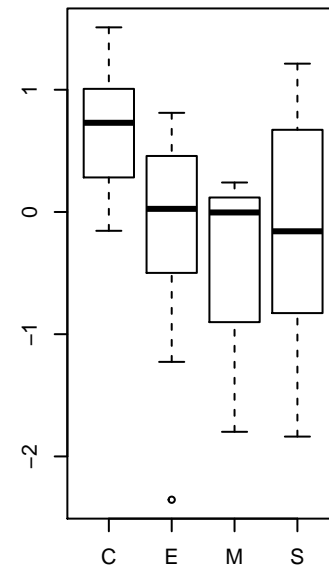

**PDGFRB P= 0.027**

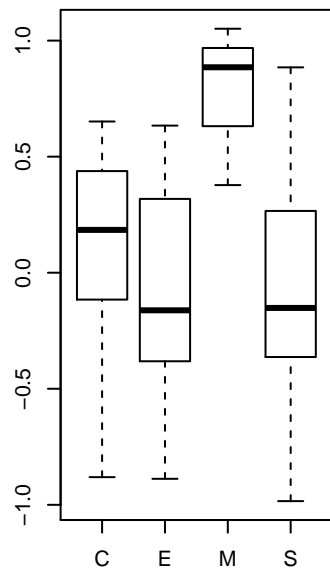

# RAF MAP kinase cascade

**ACTN2 P= 0.03**

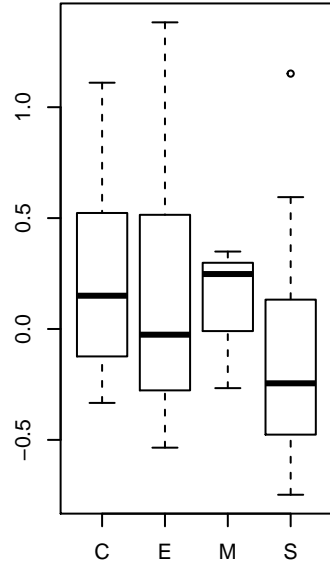

**AKAP9 P= 0.008**

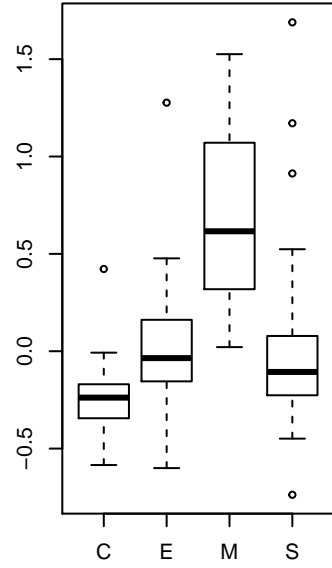

**ARRB1 P= 0.008**

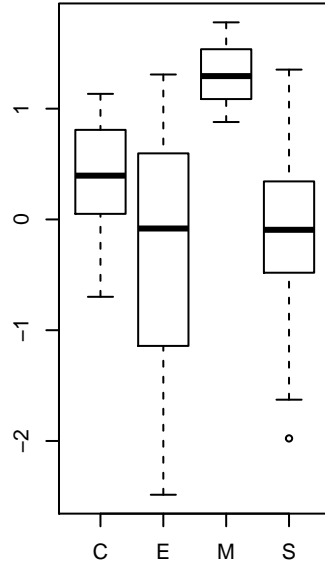

**ARTN P= 0.011**

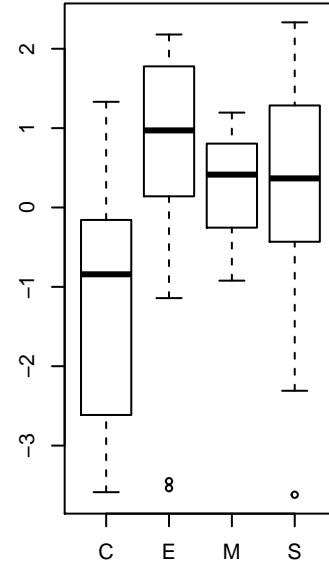

**BRAF P= 0.042**

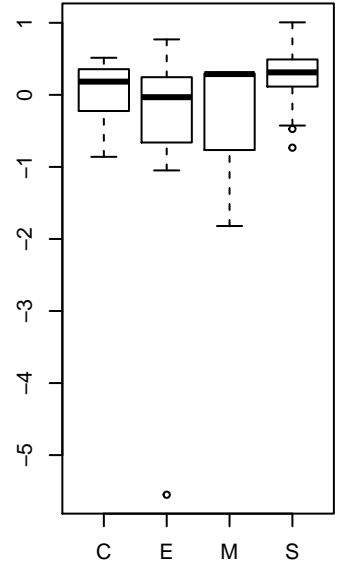

**BTC P= 0.043**

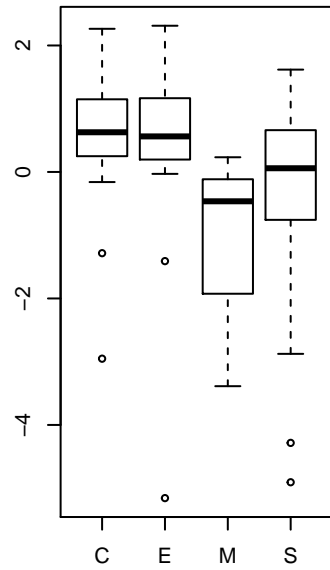

**DUSP1 P= 0.028**

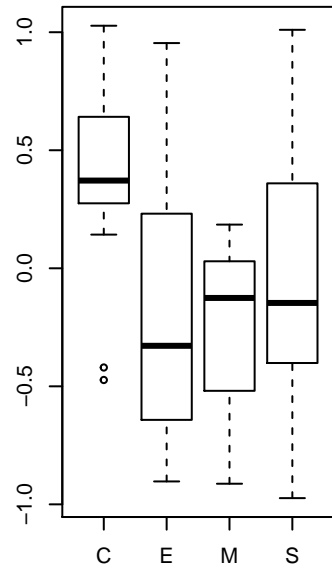

**DUSP5 P= 0.001**

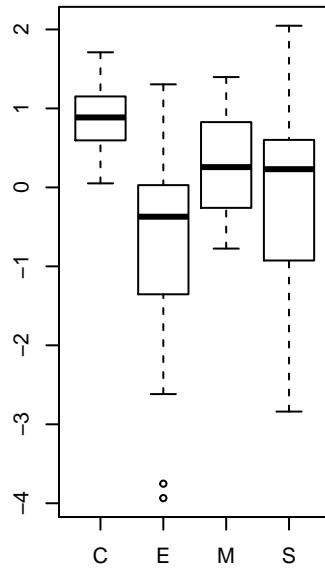

**DUSP8 P= 0.043**

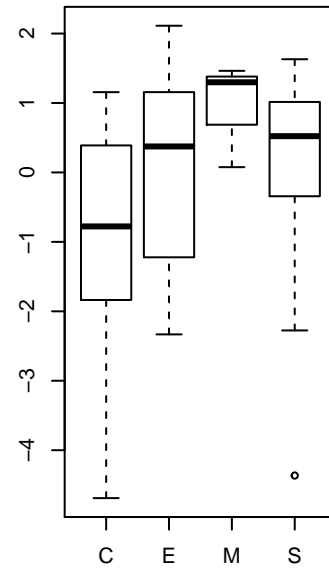

**EGFR P= 0.031**

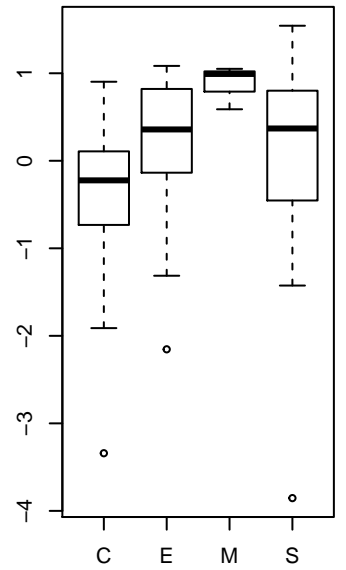



# RAF MAP kinase cascade

**ERBB2 P= 0.006**

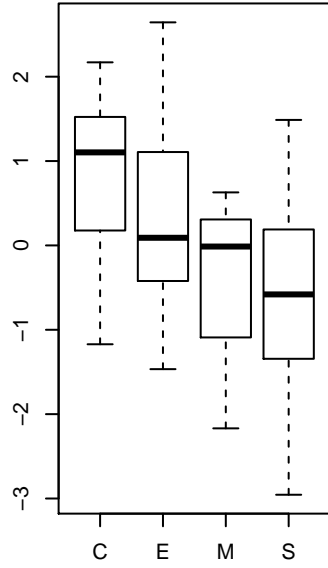

**ERBB3 P= 0.025**

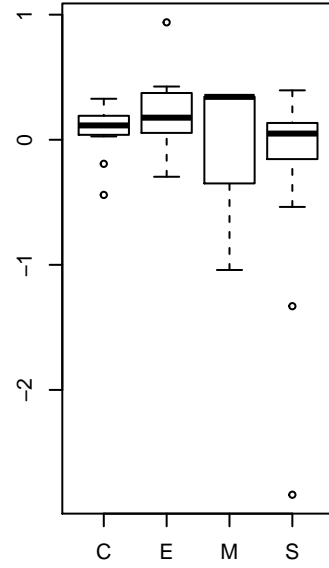

**FGA P= 0.002**

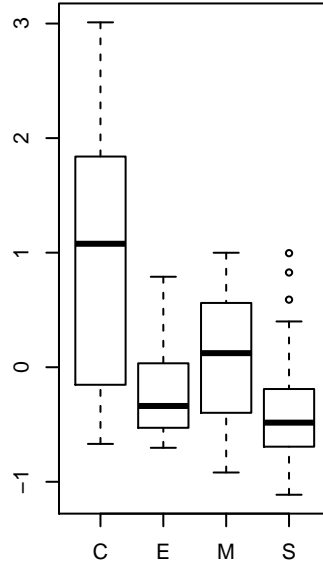

**FGF18 P= 0.007**

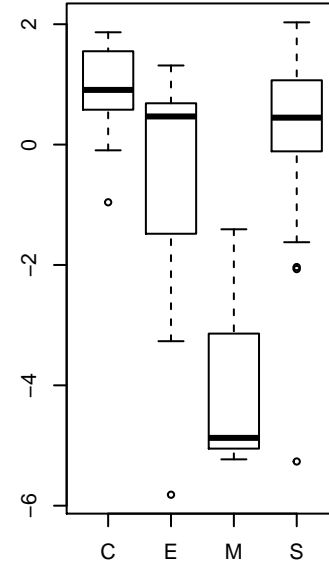

**FGF9 P= 0.012**

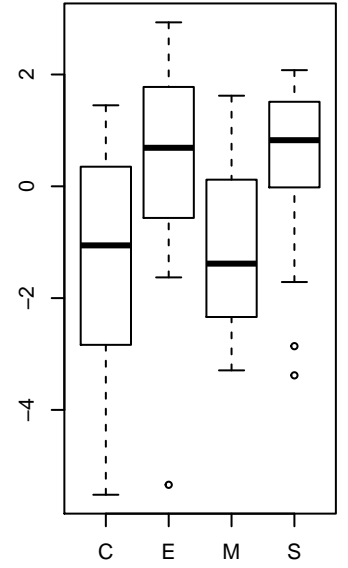

**FGFR3 P= 0.005**

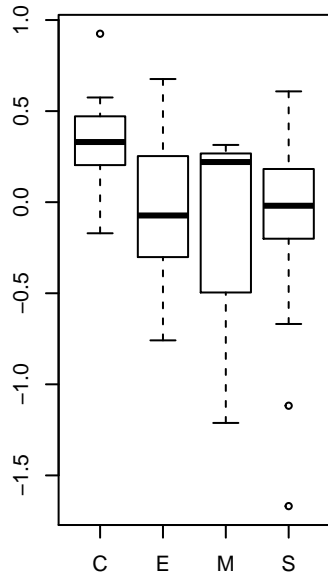

**FGFR4 P= 0**

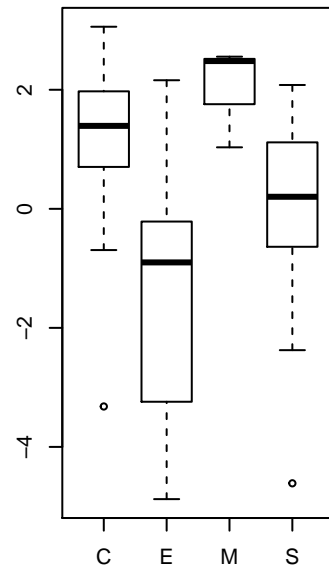

**GRB2 P= 0.007**

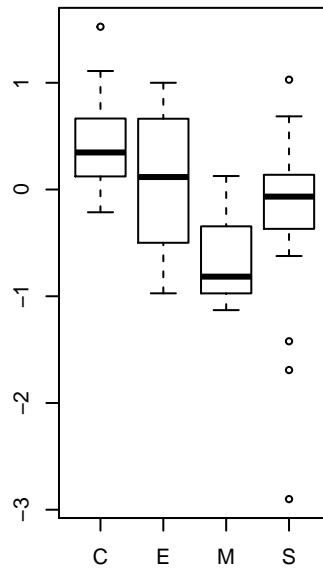

**IL17RD P= 0.036**

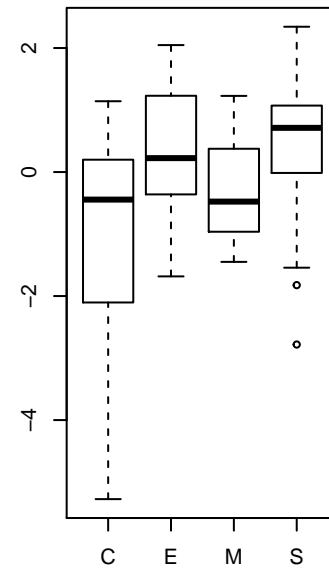

**IRS1 P= 0.02**

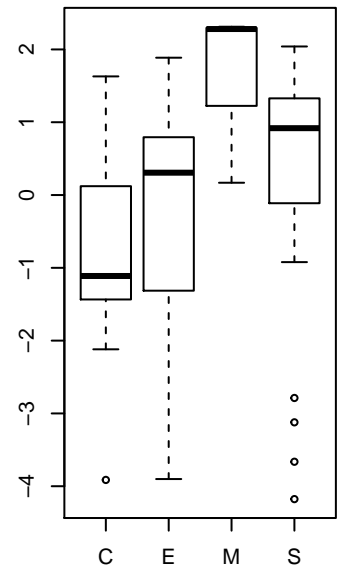

# RAF MAP kinase cascade

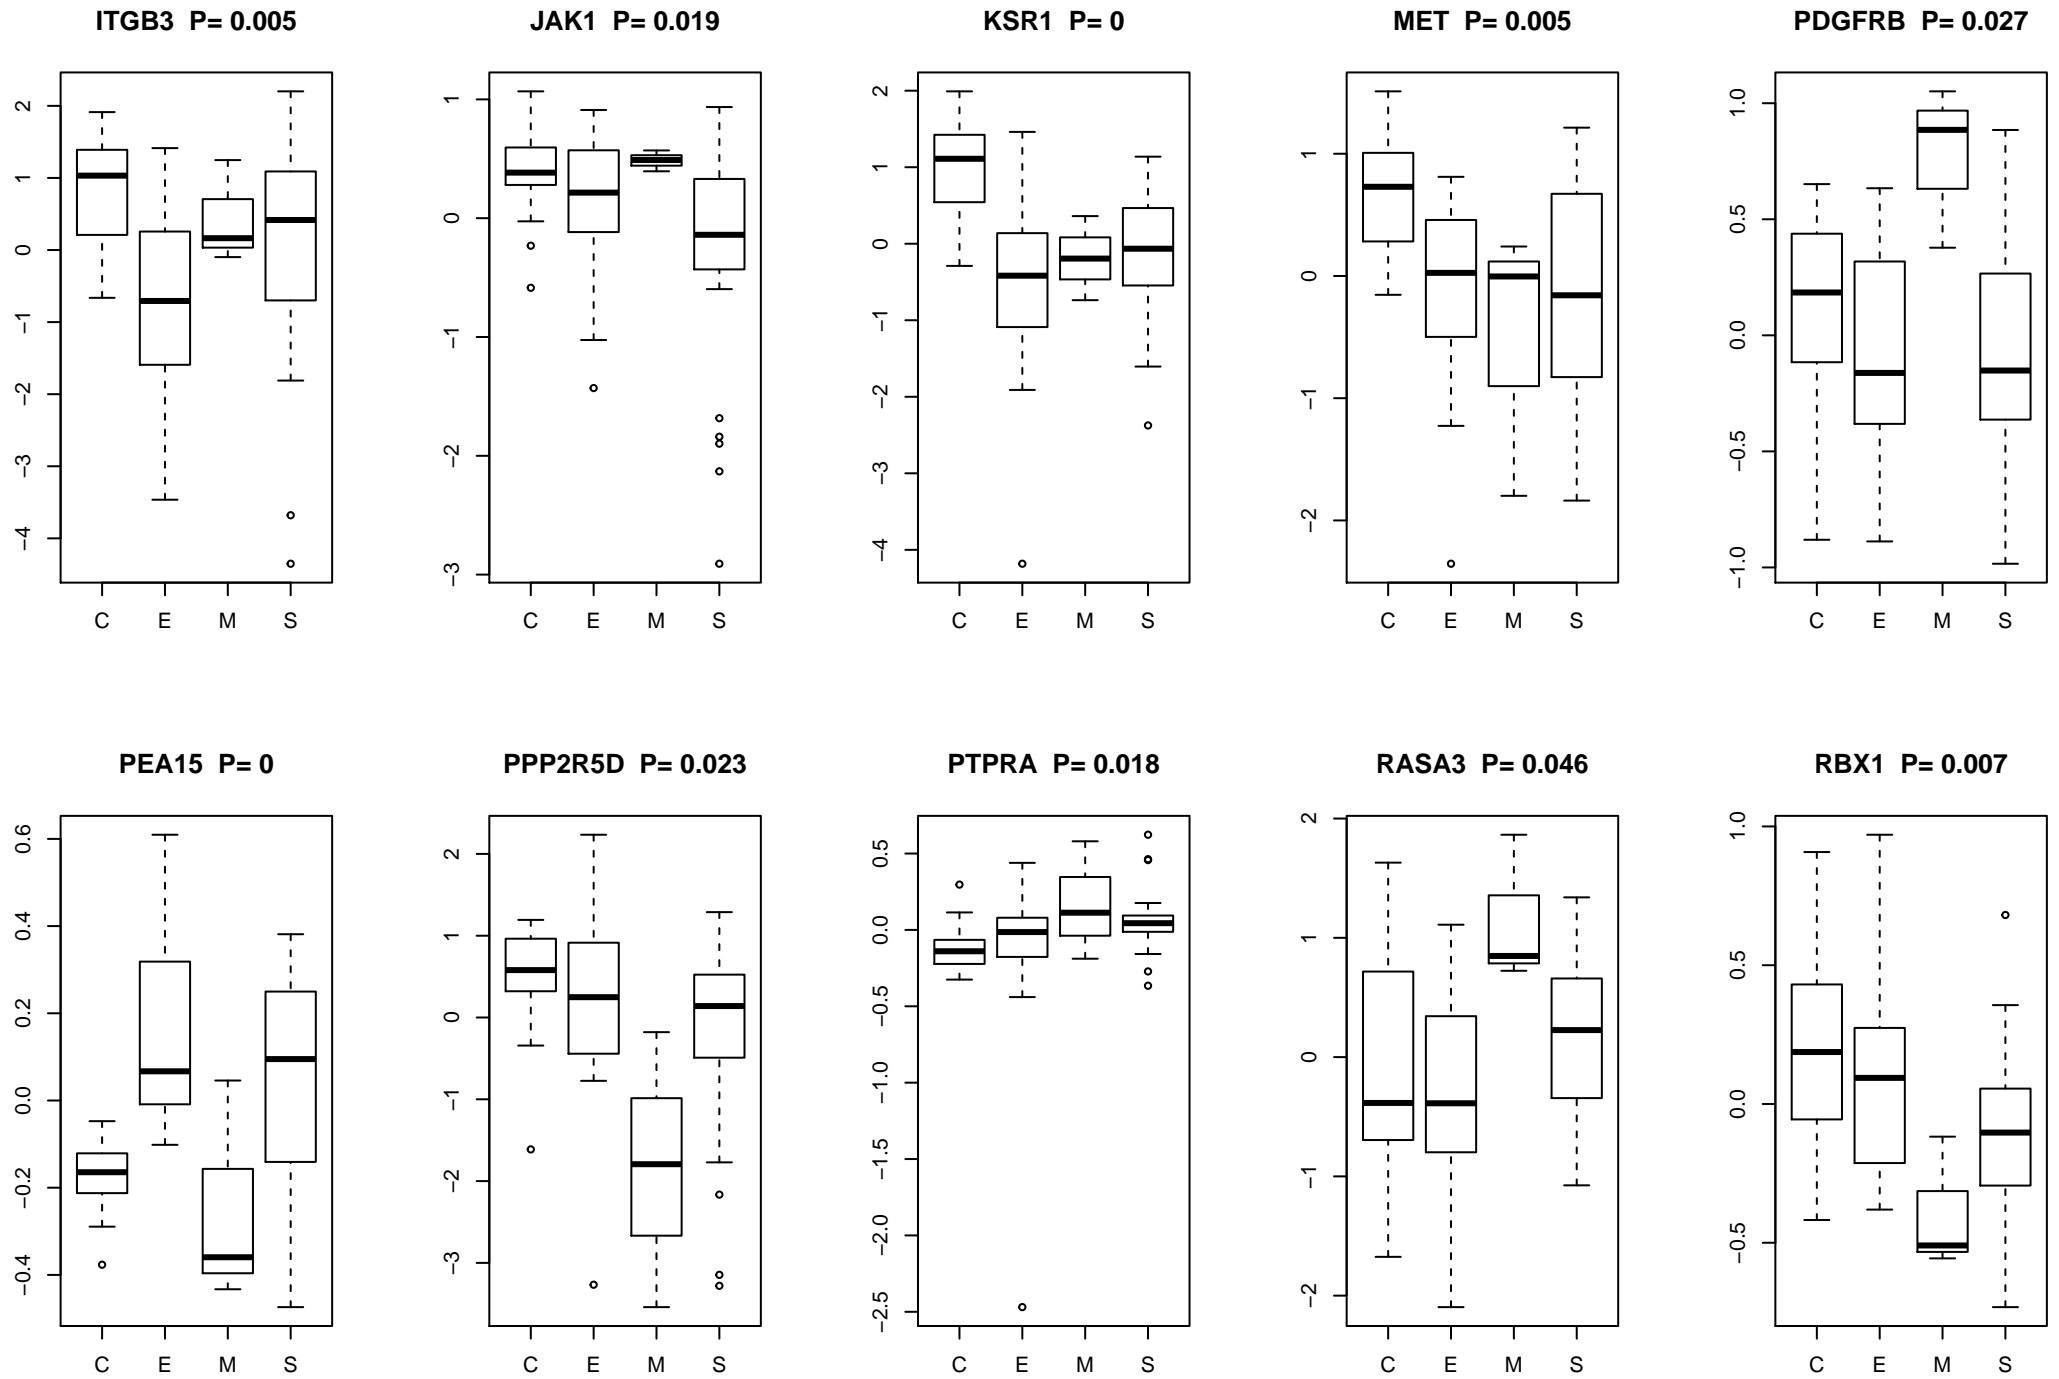

# RAF MAP kinase cascade

**RET P= 0.012**

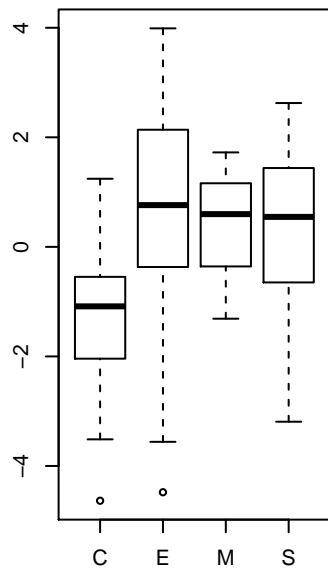

**SPTBN1 P= 0.008**

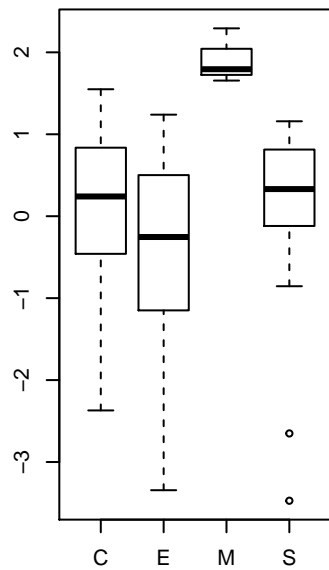

**SPTBN2 P= 0.002**

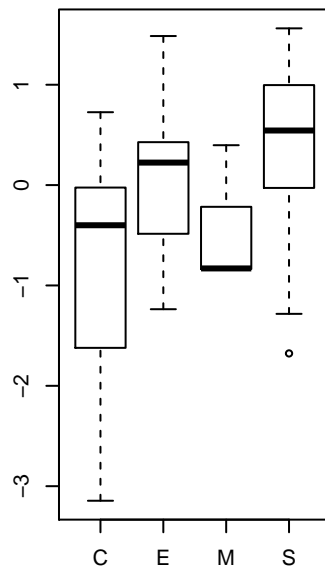

**UBA52 P= 0**

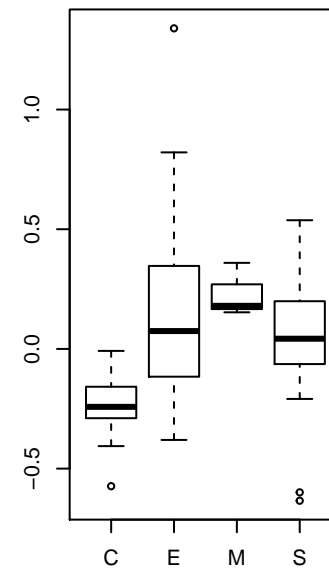

**VWF P= 0.017**

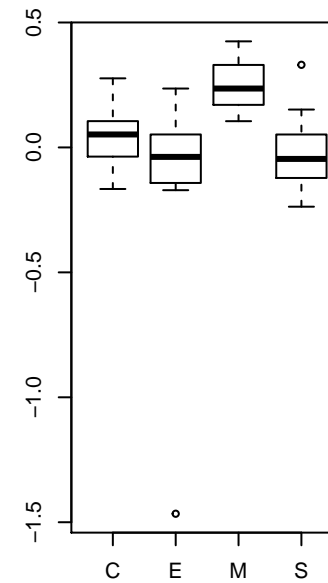

**YWHAB P= 0.016**

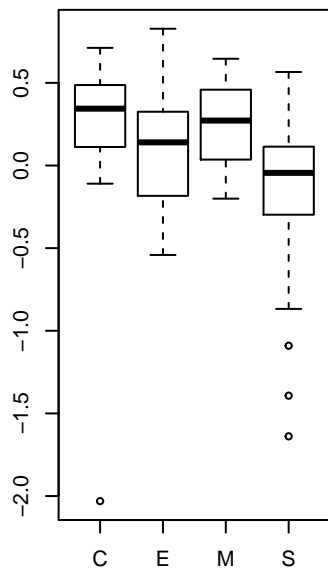

# Rho GTPase Cycle

**ARHGAP1 P= 0**

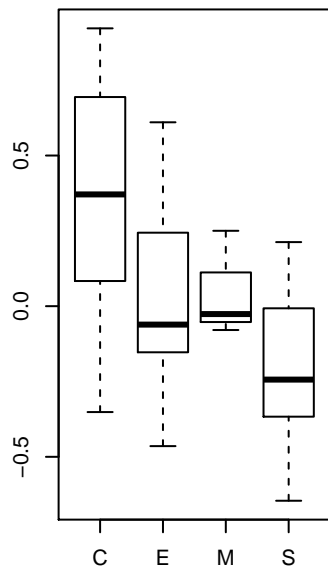

**ARHGAP26 P= 0.006**

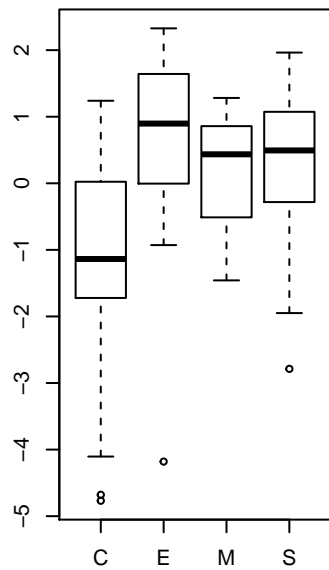

**ARHGEF16 P= 0.049**

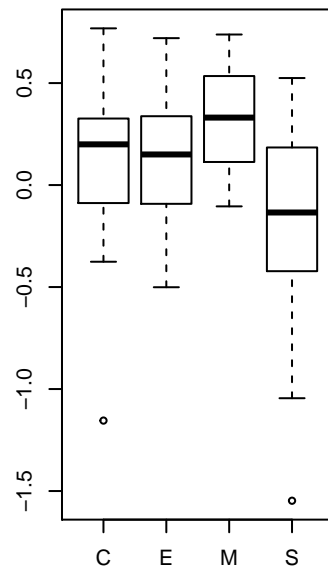

**ARHGEF19 P= 0**

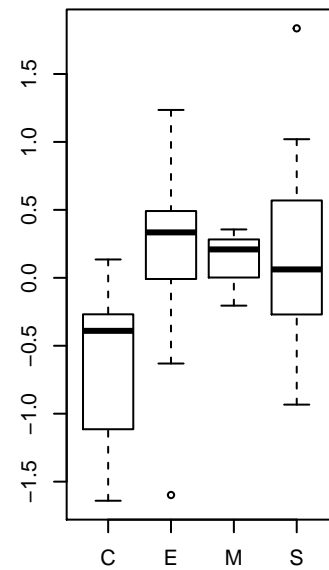

**ARHGEF2 P= 0**

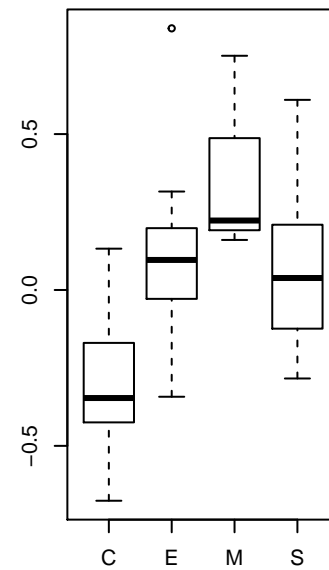

**ARHGEF5 P= 0.041**

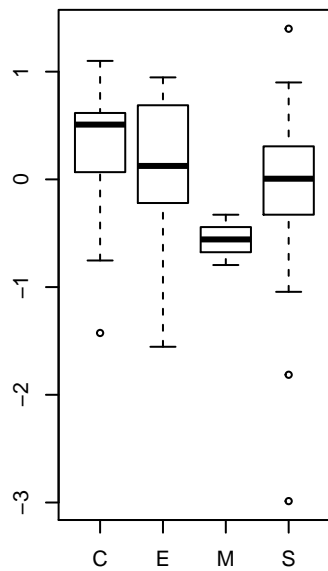

**ARHGEF6 P= 0.003**

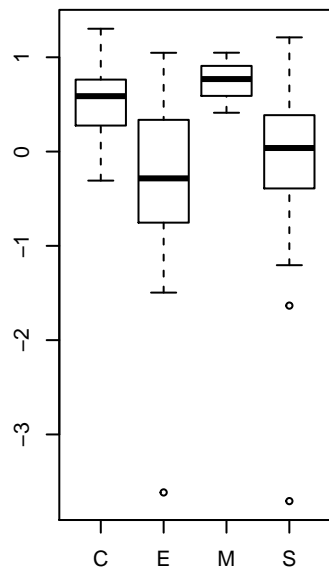

**CDC42 P= 0**

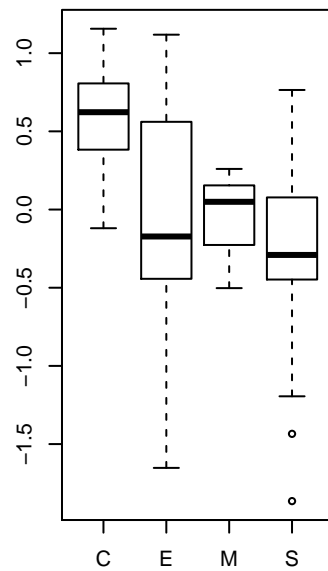

**DLC1 P= 0.047**

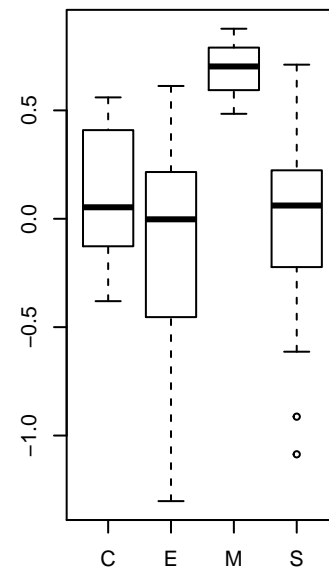

**GNA13 P= 0.006**

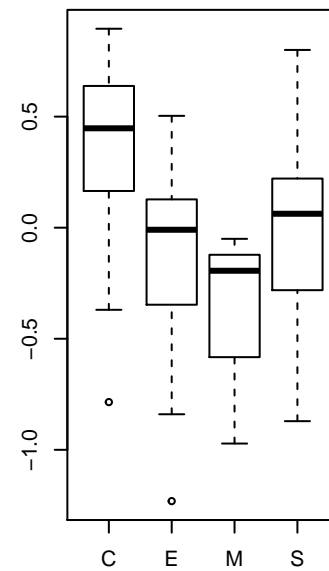

# Rho GTPase Cycle

**NET1 P= 0.004**

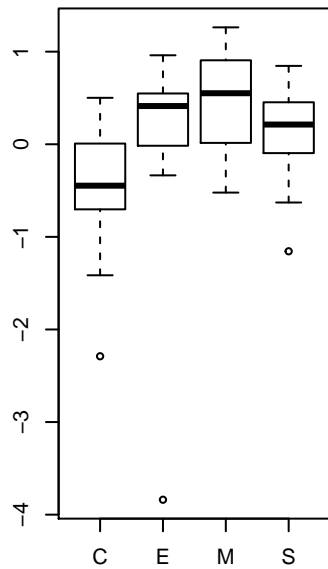

**OPHN1 P= 0.012**

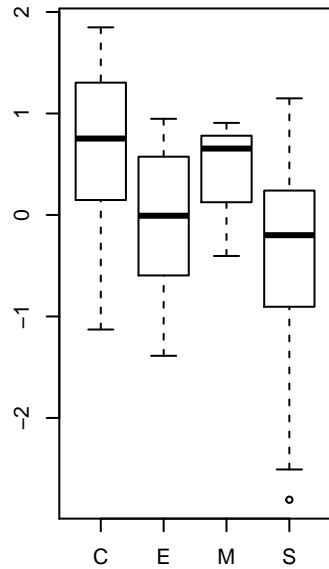

**RHOB P= 0**

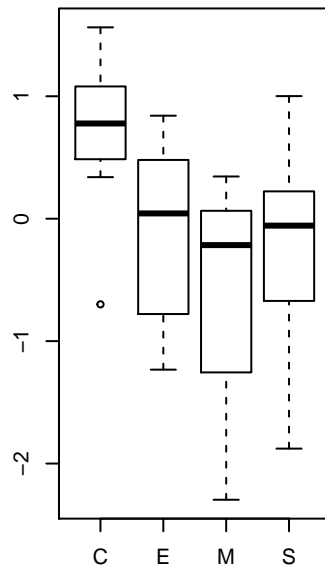

**RHOF P= 0**

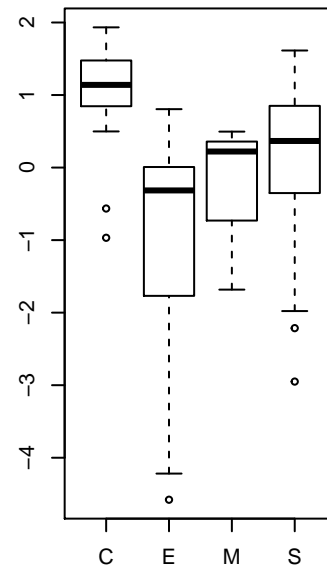

**RHOG P= 0.045**

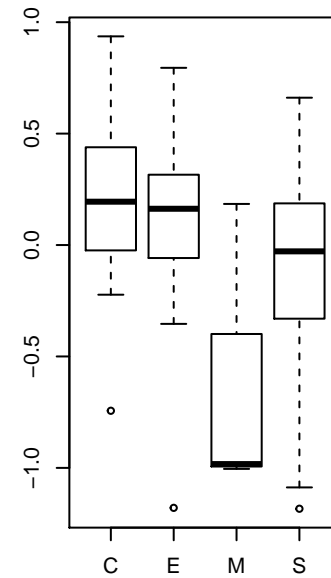

**RHOJ P= 0.026**

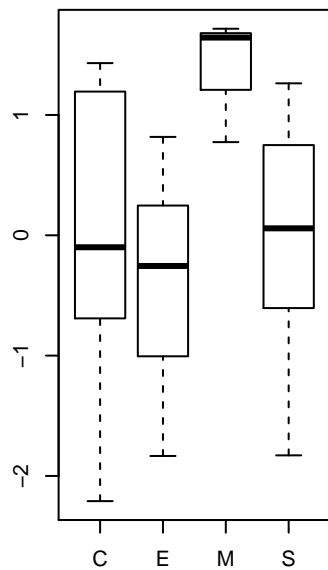

**SRGAP3 P= 0.001**

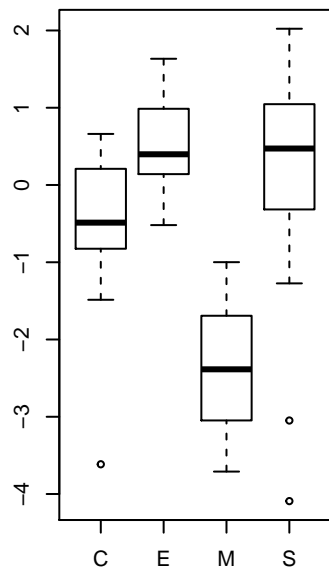

**STARD8 P= 0.004**

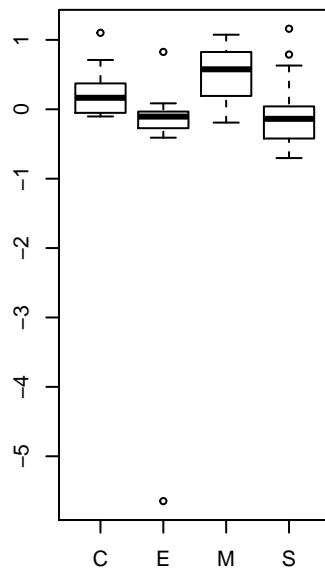

**SYDE1 P= 0.029**

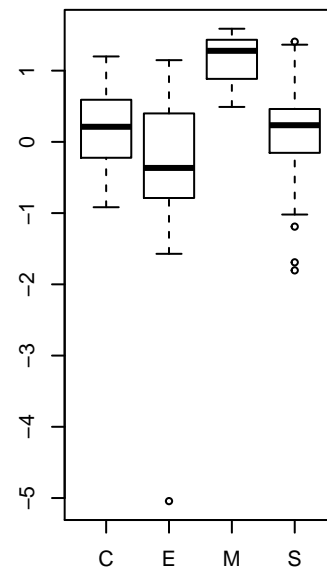

**TIAM2 P= 0.007**

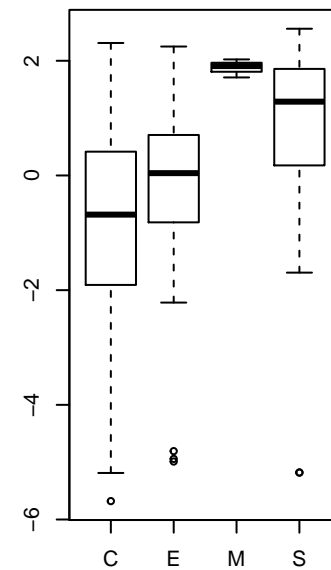

# Rho GTPase Cycle

VAV2 P= 0.001

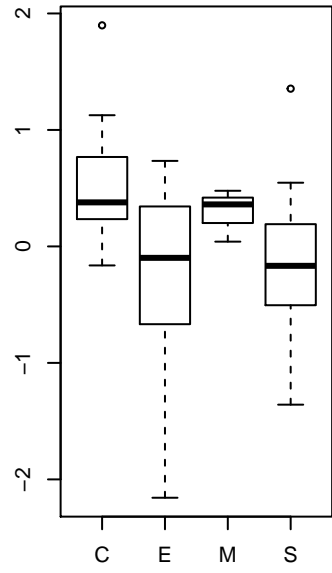

**EGFR P= 0.031**

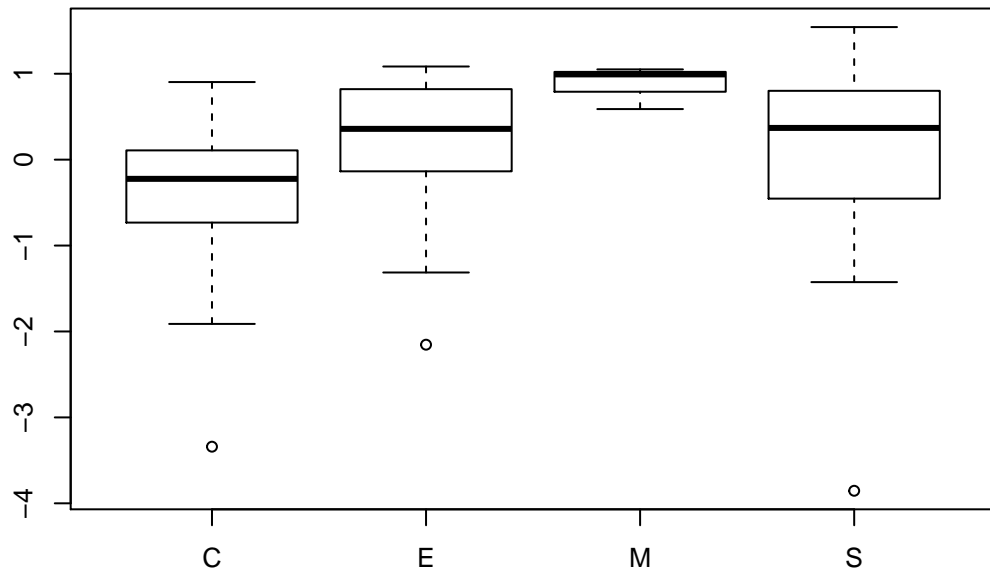

**ERBB2 P= 0.006**

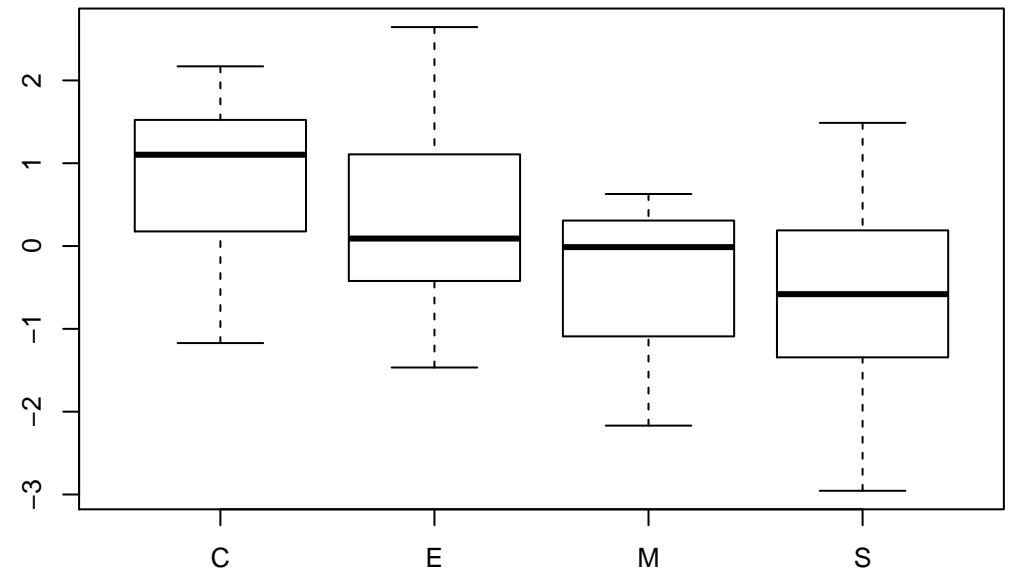

**TFAP2A P= 0.013**

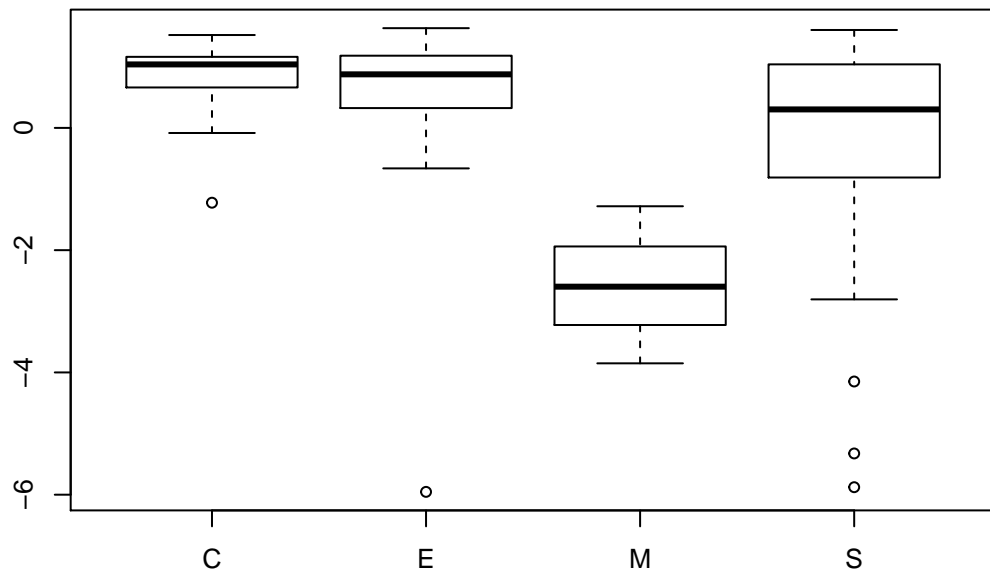

**TFAP2C P= 0.001**

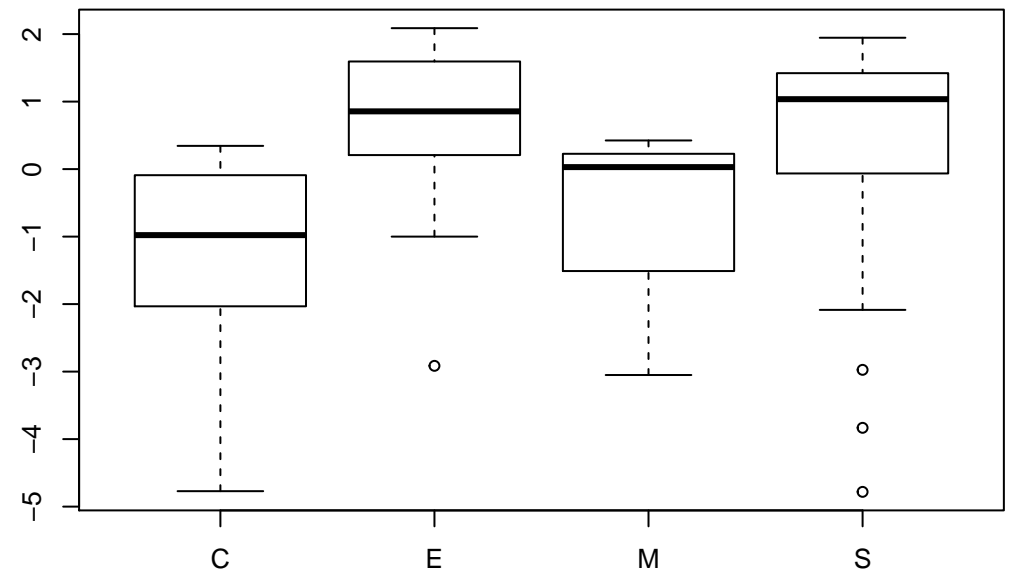

Supplement: data_sheet_2.pdf [file data_sheet_2.pdf]
